# Supplementary material for: Eye lens crystallin proteins inhibit the autocatalytic amyloid amplification nature of mature α-synuclein fibrils
Source: PubMed Central journal article supplement (PMC7323979; doi:10.1371/journal.pone.0235198), 2020-06-29

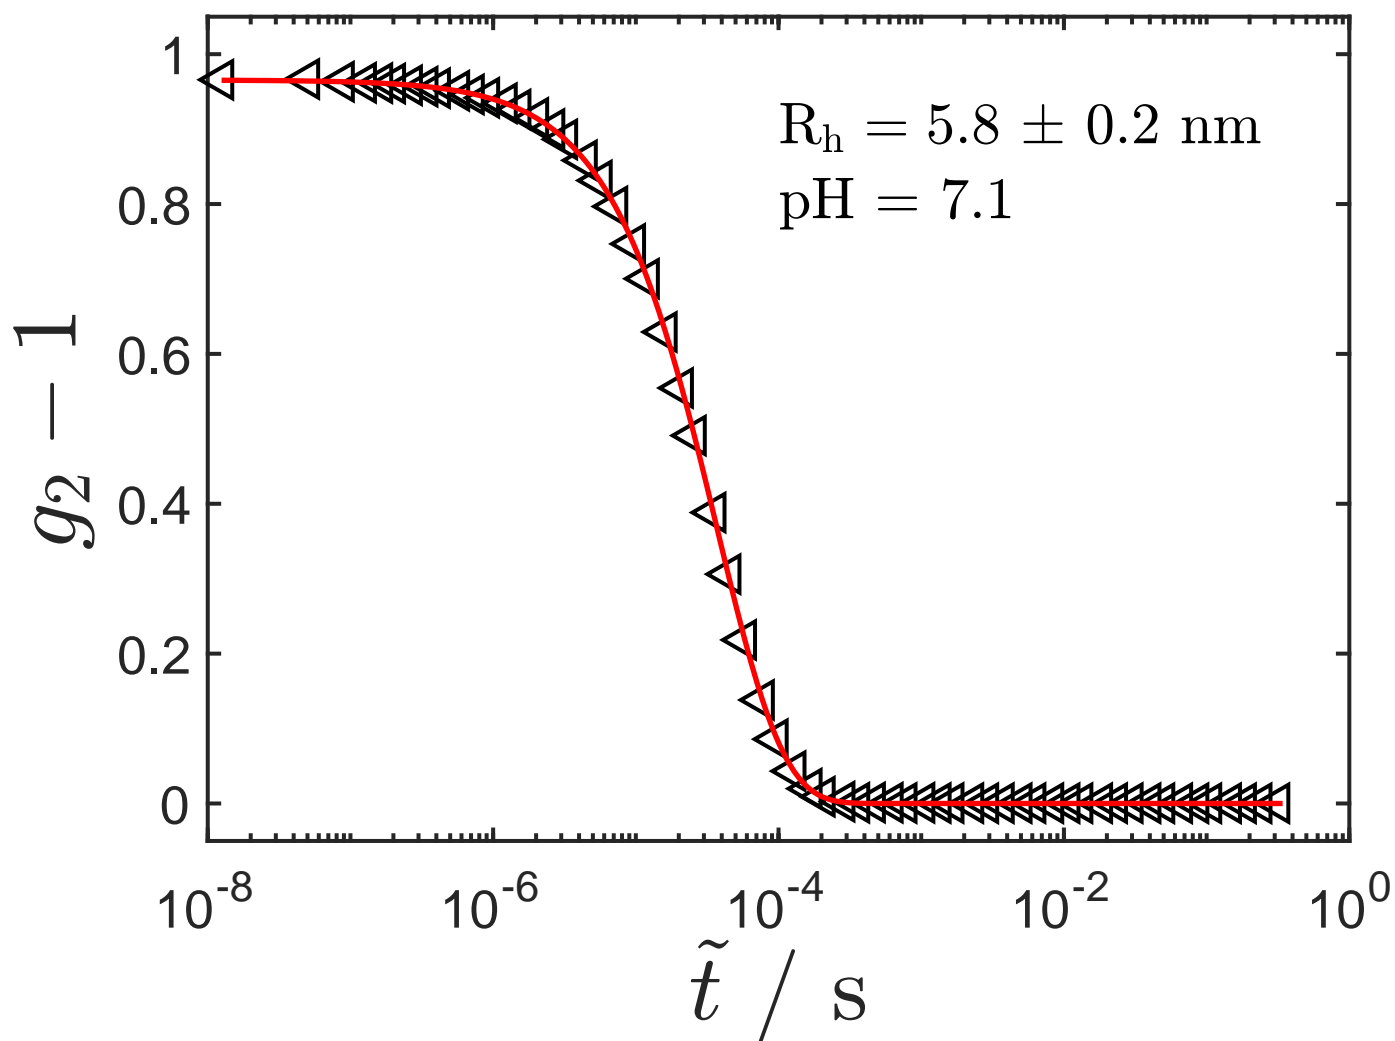

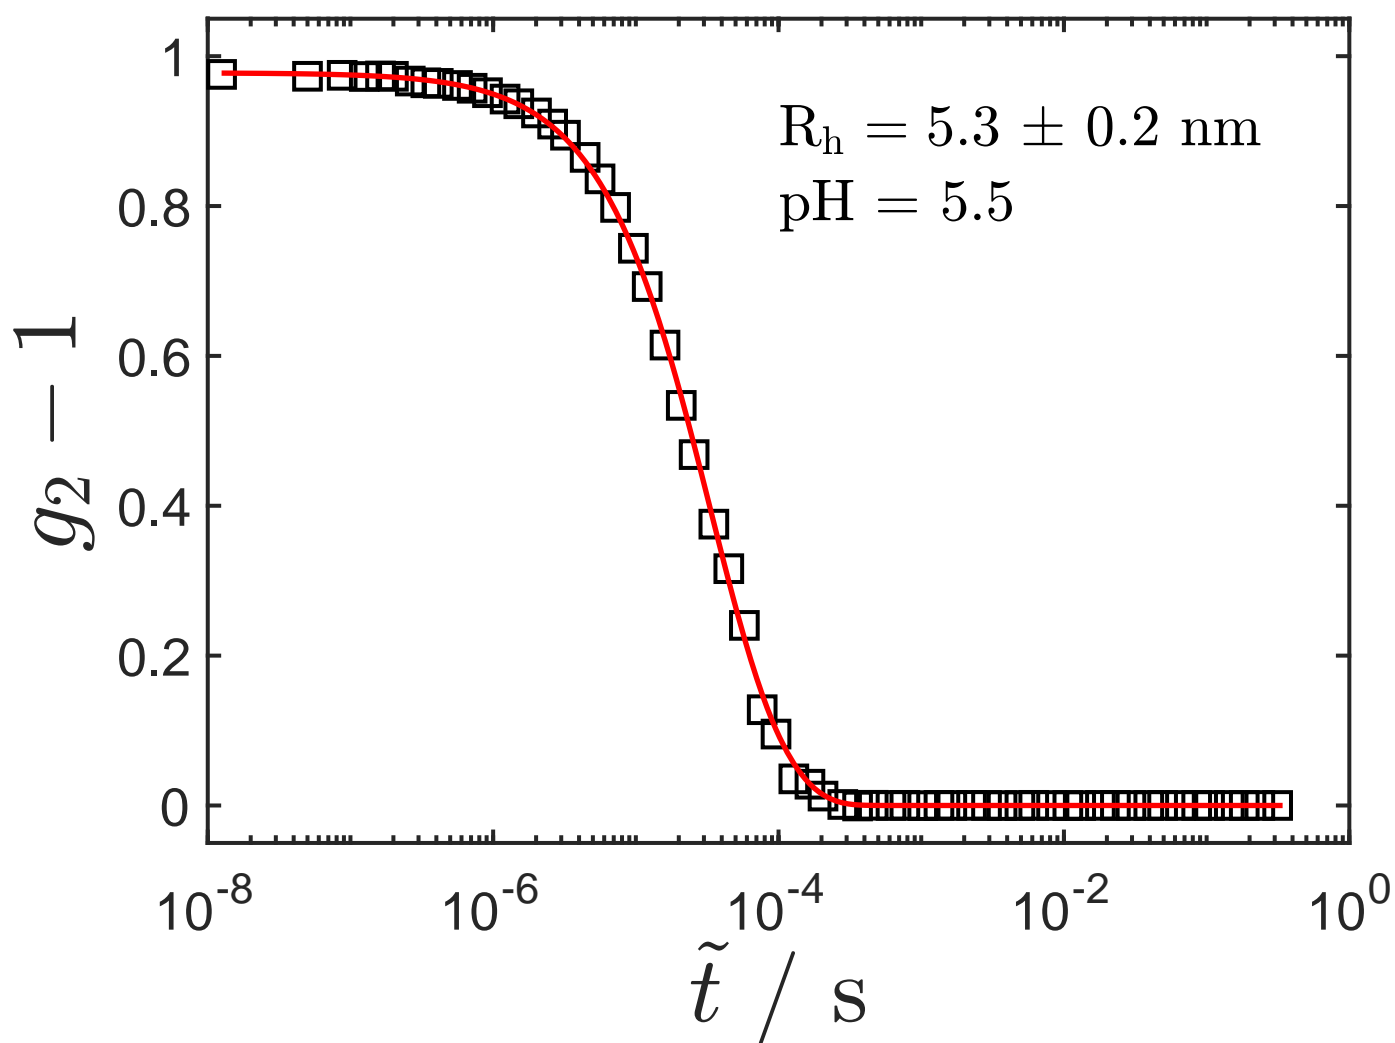

Supplement: pone.0235198.s007.pdf [file pone.0235198.s007.pdf]
